1 **Developmental and environmental plasticity in opsin gene expression**  
2 **in Lake Victoria cichlid fish**

3

4 Running title: development of cichlid opsin expression

5

6 Lucia Irazábal-González<sup>1</sup>, Daniel Shane Wright<sup>2</sup>, Martine Maan<sup>1</sup>

7 <sup>1</sup>*Groningen Institute for Evolutionary Life Sciences (GELIFES), University of*

8 *Groningen, Groningen, The Netherlands*

9 <sup>2</sup>*Division of Evolutionary Biology, Ludwig Maximilian University of Munich, Munich,*

10 *Germany.*

11 Corresponding author: Lucía Irazábal-González, Groningen Institute for Evolutionary,

12 Life Sciences, University of Groningen, Groningen, The Netherlands.

13 Email: l.irazabal.gonzalez@rug.nl

14 **Abstract**

15 In many organisms, sensory abilities develop and evolve according to the changing  
16 demands of navigating, foraging and communication across different environments and  
17 life stages. Teleost fish inhabit heterogeneous light environments and exhibit a large  
18 diversity in visual system properties among species. Cichlids are a classic example of  
19 this diversity, generated by different tuning mechanisms that involve both genetic  
20 factors and phenotypic plasticity. Here, we document the developmental progression of  
21 visual pigment gene expression in Lake Victoria cichlids and test if these patterns are  
22 influenced by variation in light conditions. We reared two sister species of *Pundamilia*  
23 to adulthood in two distinct visual conditions that resemble the two light environments  
24 that they naturally inhabit in Lake Victoria. We also included interspecific first-  
25 generation hybrids. We then quantified (using RT-qPCR) the expression of the four

26 *Pundamilia* opsins (SWS2B, SWS2A, RH2A and LWS) at 14 time points. We find that  
27 opsin expression profiles progress from shorter-wavelength sensitive opsins to longer-  
28 wavelength sensitive opsins with increasing age, in both species and their hybrids. The  
29 developmental trajectories of opsin expression also responded plastically to the visual  
30 conditions. Finally, we found subtle differences between reciprocal hybrids, possibly  
31 indicating parental effects and warranting further investigation. Developmental and  
32 environmental plasticity in opsin expression may provide an important stepping stone in  
33 the evolution of cichlid visual system diversity.

34 **Keywords:** *Pundamilia*, vision, adaptation, light, heterochrony

35 **Research highlights:** In Lake Victoria cichlid fish, expression levels of opsin genes  
36 (encoding visual pigments) differ between developmental stages and between  
37 experimental light treatments. This plasticity may contribute to the evolution of cichlid  
38 visual system diversity.

39

## 40 **Introduction**

41 Animal sensory systems mediate interactions with the environment, contributing to  
42 foraging, navigation, predator avoidance and mate selection. Sensory systems are highly  
43 diverse within and between species, associated with differences in ecological niche and  
44 life history (Stevens, 2013). For example, the visual system rapidly adapts to variation  
45 in local light conditions, resulting in inter- and intraspecific variation in visual system  
46 properties (Bowmaker, 2008; Carleton, Dalton, Escobar-Camacho, & Nandamuri,  
47 2016; Chang et al., 2021; Veilleux & Kirk, 2014). In water, where light transmission is  
48 poorer than on land, there is substantial heterogeneity in light conditions, mediated by  
49 water depth and transparency. As a result, variation in visual properties is high across

50 aquatic vertebrates, compared to other groups (Bowmaker et al., 1994; Loew &  
51 McFarland, 1990).

52 Cichlids are a family of teleost fish that has rapidly diverged into numerous species  
53 across Africa, Asia, South America and Central America (Kocher, 2004; Salzburger,  
54 2018; Seehausen, 2006). The species inhabit different photic environments, and their  
55 visual system properties are highly diverse (Carleton & Yourick, 2020). Some of this  
56 diversity is genetically encoded, such as variation in the opsin gene sequences that  
57 affect the wavelength absorption properties of the visual pigments, and the subset of  
58 opsin genes actually expressed (Carleton et al., 2016; Carleton, Parry, Bowmaker, Hunt,  
59 & Seehausen, 2005; Carleton et al., 2008; Hofmann et al., 2009). Other aspects of the  
60 visual system can be influenced by developmental or environmental plasticity, including  
61 the expression levels of the opsin genes and the use of alternative chromophores  
62 (Carleton et al., 2016; Carleton & Kocher, 2001; Halstenberg et al., 2005; Härer,  
63 Torres-Dowdall, & Meyer, 2017; Hofmann et al., 2009). In this study, we examine the  
64 developmental trajectory of relative opsin expression in two Lake Victoria cichlid  
65 species (genus *Pundamilia*) and their hybrids and investigate the influence of light-  
66 induced plastic variation in opsin expression.

67 Cichlids have seven distinct cone opsin genes: the short-wavelength-sensitive opsins  
68 SWS1 (UV), SWS2B (violet), SWS2A (blue); the medium-wavelength-sensitive opsins  
69 RH2A $\alpha$ , RH2A $\beta$ , RH2B (green); and the long-wavelength-sensitive opsin LWS (red)  
70 (Carleton et al., 2016; Carleton et al., 2005). During development, opsin expression  
71 profiles may change, and species differ in their developmental patterns. This variation  
72 (heterochrony) may provide a target for divergent selection and contribute to the  
73 evolution of differences in opsin gene expression observed across species (Carleton et

74 al., 2008; Härer et al., 2017; O'Quin, Smith, Sharma, & Carleton, 2011; Sandkam et al.,  
75 2020).

76 Carleton et al. (2008) characterised the developmental patterns of opsin expression in  
77 two Lake Malawi cichlid clades (sand-dwelling *Dimidiochromis compressiceps* and  
78 *Tramitichromis intermedius* and rock-dwelling *Metriaclima zebra* 'gold', *Metriaclima*  
79 *zebra*, *Metriaclima benetos*, and *Labeotropheus fuelleborni*) and an ancestral riverine  
80 cichlid lineage (*Tilapia*, *Oreochromis niloticus*). *O. niloticus* expressed predominantly  
81 short-wavelength-sensitive opsins as larvae (SWS1 and RH2B), increased the  
82 expression of medium-wavelength-sensitive opsins as juveniles (SWS2B and RH2A)  
83 and finally expressed high amounts of long-wavelength-sensitive opsins as adults  
84 (SWS2A, RH2A and LWS) (Carleton et al., 2008). Rock-dwelling Lake Malawi larvae  
85 and juveniles expressed short- and medium-wavelength-sensitive opsins (SWS1,  
86 SWS2B and RH2A) and maintained this expression pattern until adulthood. Larvae and  
87 juveniles of the sand-dwelling species expressed long-wavelength-sensitive opsins  
88 (SWS2A, RH2A and LWS) and maintained this expression profile throughout  
89 development. Carleton et al. (2008) hypothesised that the developmental pattern of  
90 opsin expression in Lake Victoria cichlids resembles that observed in the Lake Malawi  
91 sand-dwellers, but the available data comes from only a small number of Lake Victoria  
92 juveniles sampled at a single time point (Carleton et al., 2005; Carleton et al., 2008).  
93 Therefore, the developmental pattern of opsin expression in Lake Victoria cichlids  
94 remains to be established.

95 *Pundamilia pundamilia* and *Pundamilia nyererei* are two closely related cichlid species  
96 that co-occur at several rocky islands in southeast Lake Victoria, in the Mwanza and  
97 Speke Gulfs (Seehausen et al., 2008). Water transparency differs between sites, with  
98 turbid waters in the south and clearer waters in the north (Castillo Cajas, Selz,

99 Ripmeester, Seehausen, & Maan, 2012). Both species are consistently depth-segregated  
100 at all locations but with more overlap in more turbid locations. *P. pundamilia* is  
101 restricted to shallow waters (0 - 2 m), while *P. nyererei* is most abundant at 3 - 10 m  
102 depth, where the light spectrum is shifted towards longer wavelengths and is largely  
103 lacking short-wavelength light (Seehausen et al., 2008). Anatomically, both species are  
104 similar, but they differ in male coloration. *P. pundamilia* males are metallic blue with a  
105 blue dorsal fin, and *P. nyererei* males are red with yellowish flanks. Females of both  
106 species are cryptic yellow/grey.

107 In this study, we use fish from Python Island, where until recently, the blue and red  
108 species were thought to be *P. pundamilia* and *P. nyererei*, respectively. However, Meier  
109 et al. (2017; 2018) showed that the population at Python Island represents a separate  
110 speciation event and is, therefore, referred to as *P. sp. 'pundamilia-like'* and *P. sp.*  
111 *'nyererei-like'*. Across *Pundamilia* populations, and consistently linked to male colour,  
112 depth, and water clarity, the LWS opsin gene has sequence variations that alter pigment  
113 sensitivity (Hofmann et al., 2009; Seehausen et al., 2008; Wright et al., 2019). Wild  
114 populations also differ in opsin expression within and between locations (Hofmann et  
115 al., 2009; Wright et al., 2019). In the laboratory, we mimicked the natural shallow  
116 (broad-spectrum) and deep (red-shifted) light environments of Python Island and  
117 observed evidence of opsin expression plasticity: adult fish expressed more LWS and  
118 less SWS2A when reared in red-shifted light conditions, compared to their counterparts  
119 from broad spectrum light conditions (Wright et al., 2020).

120 Here, we characterise the developmental patterns of opsin expression in *P. sp.*  
121 *'pundamilia-like'*, *P. sp. 'nyererei-like'* and their hybrids. We hypothesise that the  
122 developmental patterns of both species will resemble those of the Lake Malawi sand-  
123 dwellers and that the hybrids will be intermediate. We also explore the extent of

124 environmental plasticity during development by rearing the fish in broad-spectrum and  
125 red-shifted light conditions (Maan, Seehausen, & Groothuis, 2017; Wright et al., 2017).  
126 We expect longer wavelength sensitivities in the red-shifted light condition compared to  
127 the broad-spectrum light condition. Moreover, a study in neotropical Midas cichlids  
128 suggests that the transition to the adult expression profile may be delayed in short-  
129 wavelength-rich light environments and accelerated in long-wavelength-rich  
130 environments (Härer et al., 2017), Therefore, we predict that LWS expression increases  
131 faster in the red-shifted light condition. For both overall opsin expression and its  
132 developmental pattern, we expect hybrids to respond more strongly to the light  
133 treatments than the parental species. This is because they are expected to be  
134 heterozygous for species-specific alleles influencing opsin expression, which may allow  
135 for greater environmental effects on the phenotype.

136

## 137 **Material and methods**

### 138 Fish species and breeding

139 For this experiment, we used first (F1) and second (F2) generation aquarium-reared  
140 offspring of wild caught *P. sp. 'pundamilia-like'* and *P. sp. 'nyererei-like'* collected  
141 from Python Island (-2.6238, 32.8567) in 2014.

142 For breeding, we housed several females with a single male. All fish were tagged (PIT  
143 tags, Passive Integrated Transponder, Biomark, ID, Idaho; USA, and Dorset  
144 Identification, Aalten, Netherlands). Haplochromine cichlids are maternal  
145 mouthbrooders; about five days after fertilization, the eggs were removed from the  
146 mother's buccal cavity and divided equally between light treatments (described below).

147 We reared both species, as well as their reciprocal hybrids, in both light environments.  
148 The analysed samples came from 33 aquarium-reared F1 and F2 families, with 24 dams  
149 and 16 sires (Table S1). The animal experiments that we performed for this study were  
150 approved by the animal ethics committee of the University of Groningen (DEC 6205B;  
151 AVD105002016464).

152

### 153 Housing and light conditions

154 All fish were maintained at  $25 \pm 1$  °C, on a 12:12h day:night light cycle. In both light  
155 treatments (mimicking the shallow and deep waters at Python Island), the tanks were lit  
156 with halogen bulbs (Philips Halogen Masterline ES, 35W) that were differently filtered  
157 depending on the treatment. In the deep treatment, the light was filtered with yellow  
158 (no. 15 by LEE, Andover, UK) and green filters (LEE no. 243), generating a red-shifted  
159 light spectrum (Fig. S1). In the shallow treatment, the light was filtered with the green  
160 filter only. Halogen bulbs have a limited short-wavelength radiance, so the short-  
161 wavelengths were supplemented with blue lights (Paulmann 88090 ESL Blue spiral  
162 15W) in the broad-spectrum light environment (Fig. S1). Further details on the light  
163 treatments and a comparison to the spectral conditions at Python Island are provided in  
164 the supplementary information.

165

### 166 Samples

167 Fish were sampled at 14 different time points, ranging from 10 to 180 days post  
168 fertilization (dpf) (Table S2; *Pundamilia* reach sexual maturity at ~8 months of age; i.e.,  
169 ~240 dpf). To control for variation between families, we aimed to include at least two  
170 different families at each point. Based on previous studies (Carleton et al., 2008; O'Quin

171 et al., 2011) and on pilot trials of total RNA isolation from fish of various ages, the  
172 number of eyes sampled differed between time points: we pooled both eyes from 2  
173 individuals at 10 - 20 dpf, both eyes from 1 individual at 30 - 60 dpf, and used 1 eye  
174 from a single fish from 70 dpf onwards. Whole eyes were used up to 90 dpf; from 120  
175 dpf onwards we used retinal tissue.

176 Fish were euthanized using an overdose of MS-222 buffered with sodium bicarbonate,  
177 and the eyes were removed, preserved in RNALater (Ambion®, Foster City, CA, USA)  
178 and frozen until qPCR analysis (detailed below). Previous studies have shown a  
179 circadian rhythm in opsin expression (Halstenberg et al., 2005). To minimize variation  
180 and maximize yield, all samples were collected between 16:00 and 18:00.

181

#### 182 Quantification of opsin expression by RT-qPCR

183 Following previous studies (Wright et al., 2019; Wright et al., 2020), we isolated total  
184 RNA with Trizol (Ambion) and reverse-transcribed one microgram of RNA from each  
185 sample with Oligo (dT)<sub>18</sub> (100µM) (Thermo Scientific, Life Technologies) and  
186 RevertAid H minus RT reverse transcriptase (Thermo Scientific, Life Technologies) at  
187 45 °C.

188 We performed real time quantitative PCR (RT- qPCR) to quantify the relative  
189 expression of the four opsins present in adult Lake Victoria cichlids (SWS2B, SWS2A,  
190 RH2A and LWS (Hofmann et al., 2009)), using gene-specific TaqMan® primers and  
191 probes (Table S2). RH2A $\alpha$  and RH2A $\beta$  were analysed together as RH2A because they  
192 are highly similar in sequence and function (Parry et al., 2005). Fluorescence was  
193 monitored during 50 cycles with a BIO-RAD C1000 Thermal Cycler (CFX96 Real  
194 Time System) (95 °C for 2 minutes, 95 °C for 50 seconds and 60 °C for 1 minute).



195 We used LinRegPCR® to determine the critical threshold for each sample. This  
196 program examines the log-linear part of the PCR curve for each sample to determine the  
197 upper and lower limit of the “window of linearity”. Linear regression analysis is then  
198 used to calculate the intercept (i.e., the estimated initial concentration) (Ramakers,  
199 Ruijter, Deprez, & Moorman, 2003). We used the same approach to calculate the slope  
200 and the intercept of a serially diluted construct of the four opsin genes ligated together.  
201 We used the following equation to calculate the relative opsin gene expression:

$$\frac{N_0}{N_{all}} = \frac{e^{\left(\frac{Cti-b}{m}\right)}}{\sum e^{\left(\frac{Cti-b}{m}\right)}}$$

202 where  $N_0/N_{all}$  represents the expression of each opsin gene, relative to total opsin  
203 expression.  $Cti$  is the threshold cycle number for the focal opsin,  $b$  is the intercept of the  
204 mean  $Cti$  of each diluted point of the ligated standard, and  $m$  the slope of this ligated  
205 standard. All samples were run twice.

206

### 207 Data analysis

208 We discarded samples with PCR efficiencies below 1.75 and above 2.25 and when the  
209  $Cq$  standard deviation between replicates was greater than 0.5. To avoid unwarranted  
210 exclusion of low expression levels, we did not apply these rules for opsins with < 1% of  
211 the total expression (efficiencies decrease and error rates increase at such low  
212 concentrations). The relative expression of each opsin is defined in relation to the other  
213 three opsins, so discarding a sample for one opsin means discarding the entire sample.  
214 The RT-qPCR from the discarded samples was repeated once for any opsin that fell  
215 outside of the parameters mentioned above. After applying these quality thresholds, 26  
216 of 239 samples were discarded.

217 Prior to statistical analysis, we performed an outlier check with Tukey’s method  
218 identifying the outliers that fell above and below the 1.5 interquartile range. For this  
219 procedure, we divided the dataset by species and treatment. Moreover, due to the  
220 change in opsin expression with developmental time (see results), the data was divided  
221 by age of sampling (10 to 30 dpf and 40 dpf onwards). This analysis was performed to  
222 ensure that the dataset did not contain artefacts from the sampling, RT-qPCR or the  
223 methodology (as discussed in Carleton et al., 2005; Hofmann et al., 2009; Wright et al.,  
224 2019; Wright et al., 2020). Thirty-four outliers were removed, leaving 179 samples for  
225 the analyses. We used linear mixed modelling (in R, R Development Core Team 2017,  
226 lmer, package lme4), separately for each opsin, with the time (dpf), species (*P. sp.*  
227 *‘pundamilia-like’*, *P. sp. ‘nyererei-like’* or hybrid) and light treatment (broad-spectrum  
228 or red-shifted) as fixed effects, and mother and father ID as random effects  
229 ( $expression \sim treatment * species * time + (1/momID) + (1/dadID)$ ). We used stepwise  
230 backward selection based on statistical significance (in R, ‘MASS’ package version 7.3-  
231 45; (Venables & Ripley, 2002)) to determine the minimum adequate model (retaining  
232 parental identities in all models to account for pseudo replication). Finally, we  
233 performed “KRmodcomp” to estimate the parameter effects, P-values, and degrees of  
234 freedom based on the Kenward-Roger approximation (in R, package ‘pbkrtest’ version  
235 0.4-6; Halekoh and Højsgaard (2014)).

236

## 237 **Results**

### 238 *Pundamilia* opsin expression throughout development

239 The expression of all four opsins changed significantly over time, as evidenced by the  
240 significant effect of time in all models - particularly during early development (10 - 90

241 dpf; Fig. 1; Table 1). Throughout development, *Pundamilia* expressed high proportions  
 242 of LWS, followed by RH2A, SWS2A and SWS2B. With time, RH2A expression  
 243 decreased from ~25% to below 20%, and LWS increased from ~60% to ~75%. The  
 244 expression of both SWS2 opsins was low in early development (~5%). SWS2A  
 245 increased to about 20%, while SWS2B decreased to nearly 0 at 50 dpf. The expression  
 246 of all four opsins stabilized after 200 dpf, reaching the levels previously established for  
 247 adult fish (Fig. 1).

248

249 **Table 1. Parameter estimates from the models explaining variation in opsin expression.** Time  
 250 represents the days post fertilization, treatment represents the light conditions (broad-spectrum or red-  
 251 shifted) and species represents the different crosses (*P.sp. 'pundamilia-like'* or *P. sp. 'nyererei-like'* or  
 252 their hybrids). We used the *Anova* function ('car' package) to estimate the parameter effects, degrees of  
 253 freedom and P-values of the significant factors in the minimum adequate model. For the removed factors,  
 254 we used "KRmodcomp" to compare the minimum adequate model with a model containing the removed  
 255 factor(s).

| <b>SWS2B</b>           | <b>F</b> | <b>Df</b>              | <b>Df resid</b>        | <b>P</b>   |
|------------------------|----------|------------------------|------------------------|------------|
| time                   | 119.0229 | 1                      | 168.23                 | < 0.001*** |
| treatment              | 91.2334  | 1                      | 155.25                 | < 0.001*** |
| time:treatment         | 5.8824   | 1                      | 156.45                 | 0.016*     |
| <b>Removed factors</b> | <b>F</b> | <b>ndf<sup>†</sup></b> | <b>ddf<sup>‡</sup></b> | <b>P</b>   |
| time:species           | 0.0396   | 2                      | 116.518                | 0.96       |
| treatment:species      | 1.1234   | 4                      | 30.1961                | 0.36       |
| species                | 0.9696   | 2                      | 11.2216                | 0.41       |
| <b>SWS2A</b>           | <b>F</b> | <b>Df</b>              | <b>Df resid</b>        | <b>P</b>   |
| time                   | 14.9456  | 1                      | 167.706                | < 0.001*** |
| treatment              | 4.7524   | 1                      | 153.903                | 0.03*      |
| species                | 1.3549   | 2                      | 10.255                 | 0.30       |
| time:treatment         | 17.5882  | 1                      | 154.815                | < 0.001*** |
| time:species           | 2.8392   | 2                      | 157.995                | 0.06•      |
| <b>Removed factors</b> | <b>F</b> | <b>ndf</b>             | <b>ddf</b>             | <b>P</b>   |
| treatment:species      | 1.8521   | 2                      | 152.1398               | 0.16       |

| <b>RH2A</b>            | <b>F</b> | <b>Df</b>  | <b>Df resid</b> | <b>P</b>   |
|------------------------|----------|------------|-----------------|------------|
| time                   | 21.7602  | 1          | 170.707         | < 0.001*** |
| treatment              | 9.5157   | 1          | 157.131         | < 0.01**   |
| species                | 41.3711  | 2          | 10.154          | < 0.001*** |
| treatment:species      | 4.8666   | 2          | 157.615         | < 0.01**   |
| <b>Removed factors</b> | <b>F</b> | <b>ndf</b> | <b>ddf</b>      | <b>P</b>   |
| time:species           | 0.6172   | 2          | 156.1669        | 0.54       |
| time:treatment         | 2.0496   | 1          | 156.2806        | 0.15       |
| <b>LWS</b>             | <b>F</b> | <b>Df</b>  | <b>Df resid</b> | <b>P</b>   |
| time                   | 30.2459  | 1          | 167.906         | < 0.001*** |
| treatment              | 0.2872   | 1          | 156.235         | 0.59       |
| species                | 25.8555  | 2          | 9.853           | < 0.001*** |
| time:treatment         | 4.0317   | 1          | 156.362         | < 0.05*    |
| treatment:species      | 3.2048   | 2          | 156.597         | < 0.05*    |
| <b>Removed factors</b> | <b>F</b> | <b>ndf</b> | <b>ddf</b>      | <b>P</b>   |
| time:species           | 0.3604   | 2          | 153.7226        | 0.7        |

† Numerator degrees of freedom

‡ Denominator degrees of freedom

256

257 Species differences

258 Expression levels of LWS and RH2A differed significantly between the species groups  
 259 (Table 1, Fig. 2), and post hoc tests showed that all pairwise comparisons were  
 260 significant (all  $P < 0.001$ ). LWS expression was highest in *P. sp. 'pundamilia-like'*,  
 261 lowest in *P. sp. 'nyererei-like'* and the hybrids were intermediate. RH2A showed the  
 262 opposite pattern: it was highest in *P. sp. 'nyererei-like'*, lowest in *P. sp. 'pundamilia-*  
 263 *like'* and the hybrids were in-between. Expression levels of the short wavelength  
 264 sensitive opsins were similar for both species and their hybrids (Table 1).

265 Despite the differences in relative opsin expression levels, there were no differences in  
266 the developmental patterns between species: the interaction between species and time  
267 did not significantly affect the expression level of any of the opsins (Table 1; there was  
268 a trend for SWS2A).

269

#### 270 Effects of the light environment

271 We found significant effects of the light treatments on SWS2B, SWS2A and RH2A (see  
272 Fig. 3 and Table 1). In broad-spectrum light, fish expressed more SWS2B and less  
273 SWS2A and RH2A compared to their counterparts from the red-shifted light  
274 environment.

275 The developmental patterns of opsin expression were similar between light conditions  
276 (Fig. 3), but the rate of change in opsin expression differed significantly. Overall,  
277 SWS2B decreased with age in both light conditions, but in broad-spectrum light,  
278 SWS2B expression was initially higher and decreased faster than in the red-shifted light  
279 condition (Fig. 3). SWS2A, on the other hand, increased in both light conditions, but the  
280 rate of change also differed (Table 1). In broad-spectrum light, SWS2A expression was  
281 initially lower, but it rapidly increased (during 10 - 50 dpf) until the expression levels  
282 were similar in both light conditions. The increase in SWS2A expression was less steep  
283 in the red-shifted light condition, where expression remained relatively stable  
284 throughout development. LWS expression was lower in early development in the red-  
285 shifted light condition and increased more steeply than in the broad-spectrum light  
286 environment. The developmental pattern of RH2A expression was not affected by the  
287 light treatments.

288 We also examined whether the two *Pundamilia* species and their hybrids responded  
289 differently to the light treatments. We found significant interaction effects (species by  
290 treatment) for RH2A and LWS expression (Table 1, Fig. 3). *P. sp. 'nyererei-like'* and  
291 the hybrids had higher RH2A expression in the red-shifted light environment, while *P.*  
292 *sp. 'pundamilia-like'* RH2A expression did not differ between conditions. LWS  
293 showed the opposite pattern: in *P. sp. 'nyererei-like'* and the hybrids it did not differ  
294 between light conditions, but *P. sp. 'pundamilia-like'* had higher LWS expression in the  
295 red-shifted light environment.

296

### 297 Hybrids

298 We also explored whether the reciprocal hybrids differed in opsin expression (Table 2,  
299 Fig. 4). For this analysis, we used samples  $\leq 90$  dpf, as we lacked older samples for the  
300 NP hybrids (NP: *P. sp. 'nyererei-like'* mother, *P. sp. 'pundamilia-like'* father; PN: *P.*  
301 *sp. 'pundamilia-like'* mother, *P. sp. 'nyererei-like'* father). Figure 4 suggests that  
302 hybrids tend to resemble their maternal species more than their paternal species,  
303 particularly in SWS2A and RH2A expression.

304 This effect was statistically significant only for RH2A, showing an interaction of time  
305 and cross type, indicating a difference in developmental pattern between PN and NP  
306 hybrids. Both hybrid types had similar RH2A expression at 90 dpf, but the NP hybrids  
307 started with high expression and rapidly decreased, similar to *P. sp. 'nyererei-like'*. The  
308 PN hybrids exhibited a more stable and lower expression level, similar to *P. sp.*  
309 *'pundamilia-like'*.

310 **Table 2. Parameter estimates from the models explaining variation in opsin expression among the**  
311 **reciprocal hybrids until 90 dpf.** Time represents days post fertilization, treatment represents the light  
312 conditions (broad-spectrum or red-shifted) and cross denotes NP (*P. sp. 'nyererei-like'* mother, *P. sp.*  
313 *'pundamilia-like'* father) or PN (*P. sp. 'pundamilia-like'* mother, *P. sp. 'nyererei-like'* father). We used

314 the *Anova* function to estimate the parameter effects, degrees of freedom and the P-values of the  
 315 significant factors in the minimum adequate model. For the removed factors, we used a “KRmodcomp”.

| <b>SWS2B</b>           | <b>F</b> | <b>Df</b>              | <b>Df resid</b>        | <b>P</b>    |
|------------------------|----------|------------------------|------------------------|-------------|
| time                   | 38.687   | 1                      | 64.318                 | < 0.001 *** |
| treatment              | 52.458   | 1                      | 60.929                 | < 0.001 *** |
| <b>Removed factors</b> | <b>F</b> | <b>ndf<sup>†</sup></b> | <b>ddf<sup>‡</sup></b> | <b>P</b>    |
| time:treatment         | 0.0905   | 1                      | 60.1676                | 0.76        |
| treatment:cross        | 0.5921   | 2                      | 9.81                   | 0.57        |
| time:cross             | 2.0146   | 1                      | 58.2417                | 0.16        |
| cross                  | 0.0812   | 1                      | 4.1869                 | 0.79        |
| <b>SWS2A</b>           | <b>F</b> | <b>Df</b>              | <b>Df resid</b>        | <b>P</b>    |
| time                   | 13.5463  | 1                      | 63.36                  | < 0.001 *** |
| treatment              | 3.2938   | 1                      | 61.152                 | 0.07•       |
| cross                  | 4.8588   | 1                      | 3.549                  | 0.10        |
| time:treatment         | 9.81     | 1                      | 61.328                 | < 0.01 **   |
| <b>Removed factors</b> | <b>F</b> | <b>ndf</b>             | <b>ddf</b>             | <b>P</b>    |
| time:cross             | 0.1285   | 1                      | 63.4182                | 0.72        |
| treatment:cross        | 1.7816   | 1                      | 62.5275                | 0.19        |
| <b>RH2A</b>            | <b>F</b> | <b>Df</b>              | <b>Df resid</b>        | <b>P</b>    |
| time                   | 15.1876  | 1                      | 65.191                 | < 0.001 *** |
| treatment              | 8.5974   | 1                      | 61.882                 | < 0.01 **   |
| cross                  | 1.7027   | 1                      | 3.696                  | 0.27        |
| time:cross             | 4.7041   | 1                      | 65.345                 | 0.03 *      |
| <b>Removed factors</b> | <b>F</b> | <b>ndf</b>             | <b>ddf</b>             | <b>P</b>    |
| time:treatment         | 0.0002   | 1                      | 60.5536                | 0.99        |
| treatment:cross        | 0.6981   | 1                      | 63.9932                | 0.41        |
| <b>LWS</b>             | <b>F</b> | <b>Df</b>              | <b>Df resid</b>        | <b>P</b>    |
| time                   | 11.915   | 1                      | 68.32                  | < 0.001 *** |
| <b>Removed factors</b> | <b>F</b> | <b>ndf</b>             | <b>ddf</b>             | <b>P</b>    |
| treatment:cross        | 1.4291   | 3                      | 15.0737                | 0.27        |
| time:treatment         | 1.3407   | 1.3407                 | 63.332                 | 0.25        |
| treatment              | 3.4179   | 1                      | 63.2963                | 0.07•       |
| time:cross             | 2.6334   | 1                      | 25.3959                | 0.12        |
| cross                  | 0.0664   | 1                      | 3.7826                 | 0.81        |

<sup>†</sup> Numerator degrees of freedom

<sup>‡</sup> Denominator degrees of freedom

316

317

318

319 **Discussion**

320 In this study, we characterised the developmental pattern of opsin expression in two  
321 Lake Victoria haplochromines, *P. sp. 'pundamilia-like'* and *P. sp. 'nyererei-like'*, and  
322 their hybrids in two distinct light conditions. Our results show that opsin expression  
323 changes over developmental time and is also influenced by environmental light.

324

325 *Pundamilia* opsin expression throughout development

326 We hypothesised that the relative opsin expression in *Pundamilia* cichlids (SWS2B,  
327 SWS2A, RH2A and LWS) would remain fairly constant across development, with  
328 relatively high long-wavelength sensitivity throughout, as previously documented in  
329 sand-dwelling cichlids from Lake Malawi (Carleton et al., 2008). Our results are partly  
330 consistent with this hypothesis: throughout development, expression of the long-  
331 wavelength sensitive opsin (LWS) was high, compared to the medium- and short-  
332 wavelength sensitive opsins (RH2A, SWS2B and SWS2A). However, contrary to the  
333 Lake Malawi sand-dwellers, opsin expression in *Pundamilia* changed over  
334 development. This resembles the developmental pattern of *O. niloticus* (Carleton et al.,  
335 2008; O'Quin et al., 2011). Therefore, the developmental pattern of *Pundamilia* cichlids  
336 falls in-between *O. niloticus* and Lake Malawi sand-dwellers. When comparing our  
337 present findings to the opsin expression levels we documented in adults (Wright et al.,  
338 2020), we observe that the opsin expression profile stabilizes around 200 dpf.

339 At 10 dpf, SWS2B expression was relatively high but quickly decreased to zero at ~100  
340 dpf. A possible adaptive explanation for high SWS2B expression in young fish might be  
341 an ontogenetic shift in the vertical distribution in the water column. In several  
342 haplochromine species from Lake Victoria, larvae and juveniles have shallower depth



343 distributions than adults (Goldschmidt, Witte, & De Visser, 1990) and shallow waters  
344 are relatively rich in short-wavelength light (captured by SWS1, SWS2B and SWS2A).  
345 The depth distribution of *Pundamilia* juveniles is unknown, but high SWS2B  
346 expression may suggest that they inhabit relatively shallow waters. SWS2B expression  
347 may also contribute to foraging efficiency; cichlids and other teleost fish change their  
348 foraging strategies as they develop, and zooplankton is an important component of  
349 larval and juvenile diets (Fryer & Iles, 1972). Short-wavelength vision particularly aids  
350 the detection of small and translucent objects (Britt, Loew, & McFarland, 2001;  
351 Carleton et al., 2008; Loew & Wahl, 1991; Novales-Flamarique & Hawryshyn, 1994;  
352 Novales Flamarique, 2013).

353

#### 354 Species differences

355 The parental species differed in LWS and RH2A expression: *P. sp. 'pundamilia-like'*  
356 had higher LWS expression than *P. sp. 'nyererei-like'*, while RH2A exhibited the  
357 opposite pattern. This is in line with earlier studies of wild caught (Wright et al., 2019)  
358 and laboratory-reared fish (Hofmann et al., 2009, Wright et al., 2020). As hypothesised,  
359 the developmental patterns of opsin expression were similar in both species.

360

#### 361 Effects of the light environment

362 The fish were reared in two light environments mimicking the natural shallow (broad-  
363 spectrum) and deep (red-shifted) light environments of Lake Victoria. These light  
364 treatments influenced opsin expression. SWS2B expression was higher in broad-  
365 spectrum light than in red-shifted light, while SWS2A and RH2A followed the opposite  
366 pattern. Higher SWS2A expression in the red-shifted condition contrasts with what was

367 previously observed in *Pundamilia* adults (Wright et al., 2020); we discuss this further  
368 below.

369 In addition to the overall expression levels, the developmental patterns of LWS,  
370 SWS2A, and SWS2B were affected by our light treatments. LWS expression increased  
371 faster in the red-shifted light condition, similar to the pattern observed in Midas cichlids  
372 (Härer et al., 2017). However, the SWS opsins showed a different effect, changing  
373 faster in the broad-spectrum light conditions: SWS2A increased faster and SWS2B  
374 decreased faster. Thus, our findings do not correspond to the general pattern suggested  
375 for neotropical cichlids, where progress towards the adult phenotype was accelerated in  
376 light conditions rich in long wavelengths (Härer et al., 2017). Rather, it seems that LWS  
377 and SWS2A increase faster in the light conditions where these opsins confer greater  
378 photon capture. To test this interpretation, experiments are needed to quantify fish'  
379 visual performance in different visual conditions and at different developmental stages.

380 When analysing the interaction between environmental light and species (*P. sp.*  
381 '*pundamilia-like*', *P. sp.* '*nyererei-like*' or hybrids), we found that LWS and RH2A  
382 expression were both species- and environment-specific (Fig. 3). *P. sp.* '*pundamilia-*  
383 *like*' reared in the red-shifted light environment expressed more LWS than their  
384 counterparts raised in broad-spectrum light. *P. sp.* '*nyererei-like*' and hybrid LWS  
385 expression did not differ between the treatments. RH2A showed the opposite expression  
386 pattern between species: *P. sp.* '*nyererei-like*' and the hybrids had higher RH2A  
387 expression in red-shifted light, while *P. sp.* '*pundamilia-like*' expression did not differ  
388 between the treatments. These results suggest that both *Pundamilia* species respond  
389 plastically to the light treatments, but in different ways. In the adults, LWS and RH2A  
390 were also differently expressed between species in the two light environments (Wright  
391 et al., 2020). However, contrary to what we observed here, adult *P. sp.* '*nyererei-like*'

392 expressed more LWS in the red-shifted condition than in the broad-spectrum condition.  
393 Hybrids only differed in SWS2A expression and *P. sp. 'pundamilia-like'* did not show  
394 any significant differences. The mismatch between our results and the data from the  
395 adults might be explained by the lack of data points between 180 dpf and the adult stage  
396 (200 dpf and older). Possibly, *P. sp. 'nyererei-like'* increase their LWS expression  
397 during this time. Additional sampling during this developmental period, as well as  
398 transfer experiments (e.g.(Härer, Karagic, Meyer, & Torres-Dowdall, 2019)), are  
399 required to establish the sensitive window for the effects of light conditions on opsin  
400 expression and potential species differences in this regard.

401 Heterochronic changes are modifications in developmental pattern compared to the  
402 ancestral state (McKinney & McNamara, 1991). For haplochromine cichlids, *O.*  
403 *niloticus* is considered to represent the ancestral pattern of opsin expression  
404 development (Carleton et al., 2008; O'Quin et al., 2011). Rock- and sand-dwelling  
405 species from Lake Malawi differ greatly from *O. niloticus*, and differences in their  
406 developmental patterns can be interpreted as adaptations to different light environments.  
407 *P. sp. 'pundamilia-like'* and *P. sp. 'nyererei-like'* also differ from *O. niloticus*. Yet,  
408 even though the two *Pundamilia* species inhabit very different natural light  
409 environments, there is little difference in their developmental patterns. We do find that  
410 they respond somewhat differently to the light treatments. This may represent a starting  
411 point for heterochronic shifts in *Pundamilia*, possibly providing a target for selection  
412 and allowing the evolution of species-specific developmental trajectories.

413

414 Hybrids

415 The developmental profiles of hybrids fell in-between the parental species. The level of  
416 environmental plasticity in opsin expression was similar between hybrids and parental  
417 species, in contrast to our prediction that hybrids might show greater plasticity, but in  
418 line with the earlier data on adults (Wright et al., 2020). We used the reciprocal hybrids  
419 ( $\leq 90$  dpf only) to test for potential parental effects on opsin expression. Our results  
420 suggest that PN (*P. sp. 'pundamilia-like'* mothers) and NP hybrids (*P. sp. 'nyererei-*  
421 *like'* mothers) may have different developmental profiles: RH2A expression decreased  
422 faster in NP hybrids than in PN hybrids. This might be interpreted as a parental effect,  
423 as PN hybrids showed more similar expression patterns to *P. sp. 'pundamilia-like'*  
424 (higher SWS2A and lower RH2A), while NP hybrids showed more similar patterns to  
425 *P. sp. 'nyererei-like'*. Thus, while our study was not designed to fully explore the  
426 influences of maternal or paternal effects on opsin expression, it provides some exciting  
427 first indications that warrant further investigation.

428

## 429 **Conclusion**

430 The evolutionary importance of heterochrony lies in the fact that certain phenotypes  
431 appear during development and are beneficial in a given environment, which can then  
432 become targets of selection, potentially leading to arrested or accelerated development.  
433 Likewise, environmentally-induced phenotypes, throughout development, are 'seen' by  
434 natural selection and can provide stepping stones for evolutionary adaptation (West-  
435 Eberhard, 2003).

436 In this study, we documented the developmental pattern of opsin expression in two  
437 species of Lake Victoria cichlids and their reciprocal hybrids.

438 We found that *Pundamilia* cichlids progress from high levels of short-wavelength-  
439 sensitive opsin expression as larvae and juveniles to high levels of long-wavelength-  
440 sensitive opsin expression as (sub)adults. This pattern may reflect differences between  
441 life stages in water depth distribution, where larvae and juveniles reside in more shallow  
442 waters, with broad-spectrum light, compared to adults. Developmental patterns were  
443 similar between the species, but the overall opsin expression levels differed between  
444 them, consistent with prior work. The developmental trajectory of opsin expression also  
445 responded plastically to the visual conditions. Finally, we found preliminary evidence  
446 for parental effects in the developmental patterns of opsin expression that warrants  
447 additional research.

448

#### 449 **Acknowledgements**

450 We acknowledge Sjoerd Veenstra and Brendan Verbeek for taking care of the fish.  
451 Financial support came from the Swiss National Science Foundation (SNSF PZ00P3-  
452 126340; to MM), the Netherlands Foundation for Scientific Research (NWO VENI  
453 863.09.005; to MM) and the University of Groningen.

454

455

#### 456 **References**

- 457 Bowmaker, J. (2008). Evolution of vertebrate visual pigments. *Vision research*, 48(20),  
458 2022-2041.
- 459 Bowmaker, J., Govardovskii, V., Shukolyukov, S., Zueva, J. L., Hunt, D., Sideleva, V.,  
460 & Smirnova, O. (1994). Visual pigments and the photic environment: the cottoid  
461 fish of Lake Baikal. *Vision research*, 34(5), 591-605.
- 462 Britt, L. L., Loew, E. R., & McFarland, W. N. (2001). Visual pigments in the early life  
463 stages of Pacific northwest marine fishes. *Journal of Experimental Biology*,  
464 204(14), 2581-2587.

- 465 Carleton, K. L., Dalton, B. E., Escobar-Camacho, D., & Nandamuri, S. P. (2016).  
466 Proximate and ultimate causes of variable visual sensitivities: insights from  
467 cichlid fish radiations. *Genesis*, 54(6), 299-325.
- 468 Carleton, K. L., & Kocher, T. D. (2001). Cone opsin genes of African cichlid fishes:  
469 tuning spectral sensitivity by differential gene expression. *Molecular Biology*  
470 *and Evolution*, 18(8), 1540-1550.
- 471 Carleton, K. L., Parry, J. W., Bowmaker, J. K., Hunt, D. M., & Seehausen, O. (2005).  
472 Colour vision and speciation in Lake Victoria cichlids of the genus *Pundamilia*.  
473 *Molecular Ecology*, 14(14), 4341-4353.
- 474 Carleton, K. L., Spady, T. C., Strelman, J. T., Kidd, M. R., McFarland, W. N., &  
475 Loew, E. R. (2008). Visual sensitivities tuned by heterochronic shifts in opsin  
476 gene expression. *BMC biology*, 6(1), 22.
- 477 Carleton, K. L., & Yourick, M. R. (2020). Axes of visual adaptation in the ecologically  
478 diverse family Cichlidae. *Semin Cell Dev Biol*, 106, 43-52.  
479 doi:10.1016/j.semcdb.2020.04.015
- 480 Castillo Cajas, R. F., Selz, O. M., Ripmeester, E. A., Seehausen, O., & Maan, M. E.  
481 (2012). Species-specific relationships between water transparency and male  
482 coloration within and between two closely related Lake Victoria cichlid species.  
483 *International Journal of Evolutionary Biology*, 2012.
- 484 Chang, C.-H., Catchen, J., Moran, R. L., Rivera-Colón, A. G., Wang, Y.-C., & Fuller,  
485 R. C. (2021). Sequence analysis and ontogenetic expression patterns of cone  
486 opsin genes in the bluefin killifish (*Lucania goodei*). *Journal of Heredity*.  
487 doi:<https://doi-org.proxy-ub.rug.nl/10.1093/jhered/esab017>
- 488 Fryer, G., & Iles, T. D. (1972). Cichlid fishes of the great lakes of Africa.
- 489 Goldschmidt, T., Witte, F., & De Visser, J. (1990). Ecological segregation in  
490 zooplanktivorous haplochromine species (Pisces: Cichlidae) from Lake Victoria.  
491 *Oikos*, 343-355.
- 492 Halekoh, U., & Højsgaard, S. (2014). A kenward-roger approximation and parametric  
493 bootstrap methods for tests in linear mixed models—the R package pbkrtest.  
494 *Journal of Statistical Software*, 59(9), 1-30.
- 495 Halstenberg, S., Lindgren, K. M., Samagh, S. P., Nadal-vicens, M., Balt, S., & Fernald,  
496 R. D. (2005). Diurnal rhythm of cone opsin expression in the teleost fish  
497 *Haplochromis burtoni*. *Visual neuroscience*, 22(2), 135-141.
- 498 Härer, A., Karagic, N., Meyer, A., & Torres-Dowdall, J. (2019). Reverting ontogeny:  
499 rapid phenotypic plasticity of colour vision in cichlid fish. *R. Soc. Open Sci.*  
500 , 6(7), Article 190841. doi:<https://doi.org/10.1098/rsos.190841>
- 501 Härer, A., Torres-Dowdall, J., & Meyer, A. (2017). Rapid adaptation to a novel light  
502 environment: the importance of ontogeny and phenotypic plasticity in shaping  
503 the visual system of Nicaraguan Midas cichlid fish (*Amphilophus citrinellus*  
504 spp.). *Molecular ecology*, 26(20), 5582-5593.
- 505 Hofmann, C. M., O'Quin, K. E., Marshall, N. J., Cronin, T. W., Seehausen, O., &  
506 Carleton, K. L. (2009). The eyes have it: regulatory and structural changes both  
507 underlie cichlid visual pigment diversity. *PLoS biology*, 7(12).
- 508 Kocher, T. (2004). Adaptive evolution and explosive speciation: The cichlid fish model.  
509 *Nature Reviews Genetics*, 5, 288–298. doi: <https://doi.org/10.1038/nrg1316>
- 510 Loew, E. R., & McFarland, W. N. (1990). The underwater visual environment. In M. D.  
511 E. Douglas (Ed.), *The Visual System of Fish*. (pp. 1-43). London: Chapman and  
512 Hall.
- 513 Loew, E. R., & Wahl, C. M. (1991). A short-wavelength sensitive cone mechanism in  
514 juvenile yellow perch, *Perca flavescens*. *Vision research*, 31(3), 353-360.

- 515 Maan, M. E., Seehausen, O., & Groothuis, T. G. (2017). Differential survival between  
516 visual environments supports a role of divergent sensory drive in cichlid fish  
517 speciation. *The American Naturalist*, 189(1), 78-85.
- 518 McKinney, M. L., & McNamara, K. J. (1991). *Heterochrony: The Evolution of*  
519 *Ontogeny*. New York: Plenum Press.
- 520 Meier, J. I., Marques, D. A., Wagner, C. E., Excoffier, L., & Seehausen, O. (2018).  
521 Genomics of parallel ecological speciation in Lake Victoria cichlids. *Molecular*  
522 *Biology and Evolution*, 35(6), 1489-1506. doi:  
523 <https://doi.org/10.1093/molbev/msy051>
- 524 Meier, J. I., Sousa, V. C., Marques, D. A., Selz, O. M., Wagner, C. E., Excoffier, L., &  
525 Seehausen, O. (2017). Demographic modelling with whole-genome data  
526 reveals parallel origin of similar Pundamilia cichlid species after hybridization.  
527 *Molecular Ecology*, 26(1), 123-141. doi: <https://doi.org/10.1111/mec.13838>
- 528 Novales-Flamarique, H., & Hawryshyn, C. (1994). Ultraviolet photoreception  
529 contributes to prey search behaviour in two species of zooplanktivorous fishes  
530 *The Journal of experimental biology*, 186(1), 187-198.
- 531 Novales Flamarique, I. (2013). Opsin switch reveals function of the ultraviolet cone in  
532 fish foraging. *Proceedings of the Royal Society B: Biological Sciences*,  
533 280(1752), 20122490.
- 534 O'Quin, K. E., Smith, A. R., Sharma, A., & Carleton, K. L. (2011). New evidence for  
535 the role of heterochrony in the repeated evolution of cichlid opsin expression.  
536 *Evolution & development*, 13(2), 193-203.
- 537 Parry, J. W., Carleton, K. L., Spady, T., Carboo, A., Hunt, D. M., & Bowmaker, J. K.  
538 (2005). Mix and match color vision: tuning spectral sensitivity by differential  
539 opsin gene expression in Lake Malawi cichlids. *Current Biology*, 15(19), 1734-  
540 1739.
- 541 Ramakers, C., Ruijter, J. M., Deprez, R. H., & Moorman, A. F. (2003). Assumption-free  
542 analysis of quantitative real-time polymerase chain reaction (PCR) data.  
543 *Neurosci Lett*, 339(1), 62-66. doi:10.1016/s0304-3940(02)01423-4
- 544 Salzburger, W. (2018). Understanding explosive diversification through cichlid fish  
545 genomics. *Nature Reviews Genetics*, 19, 705-717.  
546 doi:<https://doi.org/10.1038/s41576-018-0043-9>
- 547 Sandkam, B. A., Campello, L., O'Brien, C., Nandamuri, S. P., Gammerdinger, W. J.,  
548 Conte, M. A., Carleton, K. L. (2020). Tbx2a Modulates Switching of RH2 and  
549 LWS Opsin Gene Expression. *Mol Biol Evol.*, 37(7), 2002-2014.  
550 doi:10.1093/molbev/msaa062
- 551 Seehausen, O. (2006). African cichlid fish: A model system in adaptive radiation  
552 research. *Proceedings of the Royal Society B: Biological Sciences*, 273, 1987-  
553 1998. doi:<https://doi.org/10.1098/rspb.2006.3539>
- 554 Seehausen, O., Terai, Y., Magalhaes, I. S., Carleton, K. L., Mrosso, H. D., Miyagi, R.,  
555 Tachida, H. (2008). Speciation through sensory drive in cichlid fish. *Nature*,  
556 455(7213), 620-626.
- 557 Stevens, M. (2013). *Sensory ecology, behaviour, and evolution*: Oxford University  
558 Press.
- 559 Veilleux, C. C., & Kirk, E. C. (2014). Visual acuity in mammals: effects of eye size and  
560 ecology. *Brain Behav Evol*, 83(1), 43-53. doi:10.1159/000357830
- 561 Venables, W., & Ripley, B. (2002). Random and mixed effects. In *Modern applied*  
562 *statistics with S* (pp. 271-300): Springer.
- 563 West-Eberhard, M. J. (2003). *Developmental Plasticity and Evolution*. New York.:  
564 Oxford University Press.

565 Wright, D. S., Demandt, N., Alkema, J. T., Seehausen, O., Groothuis, T. G., & Maan,  
566 M. E. (2017). Developmental effects of visual environment on  
567 species-assortative mating preferences in Lake Victoria cichlid fish. *Journal of*  
568 *evolutionary biology*, 30(2), 289-299.  
569 Wright, D. S., Meijer, R., van Eijk, R., Vos, W., Seehausen, O., & Maan, M. E. (2019).  
570 Geographic variation in opsin expression does not align with opsin genotype in  
571 Lake Victoria cichlid populations. *Ecology and evolution*, 9(15), 8676-8689.  
572 Wright, D. S., van Eijk, R., Schuart, L., Seehausen, O., Groothuis, T. G. G., & Maan,  
573 M. E. (2020). Testing sensory drive speciation in cichlid fish: Linking light  
574 conditions to opsin expression, opsin genotype and female mate preference.  
575 *Journal of Evolutionary Biology*, 33(4), 422-434. doi:10.1111/jeb.13577

576

## 577 **Figures**

578 **Figure 1. *Pundamilia* opsin expression throughout development.** The relative  
579 expression of all four opsins (**SWS2B**, **SWS2A**, **RH2A**, and **LWS**) changed during  
580 development, as highlighted by the significant effect of time (dpf, days post-  
581 fertilization) in all models. Each point represents an individual (2 individuals pooled for  
582 time points 10 and 20 dpf), with shaded areas indicating 95% CI. The opsin expression  
583 profiles of lab-reared adults (> 200 dpf) are provided for reference (from Wright et al.,  
584 2020). Error bars represent the 95% CI.

585 **Figure 2. Opsin expression throughout development for *P. sp. 'pundamilia-like'*, *P.***  
586 ***sp. 'nyererei-like'* and their hybrids.** LWS and RH2A expression differed  
587 significantly between the species groups, but the developmental patterns were similar.

588 **Figure 3. Effects of the light treatments on the developmental patterns of**  
589 ***Pundamilia* opsin expression.** (A) The opsin expression patterns of fish housed in  
590 broad-spectrum (left panel) vs. red-shifted light (right panel). The expression of  
591 SWS2B, SWS2A and RH2A were significantly affected by the light treatments. The  
592 developmental patterns of SWS2B, SWS2A and LWS differed significantly between  
593 light environments. Shaded areas indicate 95% CI. The opsin expression profiles of lab-  
594 reared adults (> 200 dpf) is provided for reference (from Wright et al., 2020). (B) There  
595 were significantly different effects of the light treatments on RH2A and LWS  
596 expression in *P. sp. 'pundamilia-like'*, *P. sp. 'nyererei-like'* and their hybrids. Error bars  
597 represent the 95% CI.

598 **Figure 4. Differences in the developmental patterns of opsin expression between**  
599 **reciprocal hybrids.** RH2A was the only opsin that differed across time for the  
600 reciprocal hybrids; the NP hybrids had a faster decrease in their expression. The *P. sp.*  
601 *'pundamilia-like'* and *P. sp. 'nyererei-like'* panels show that the PN hybrids resemble *P.*  
602 *sp. 'pundamilia-like'* and the NP hybrids resemble *P. sp. 'nyererei-like'*. Shaded areas  
603 indicate 95% CI.

604



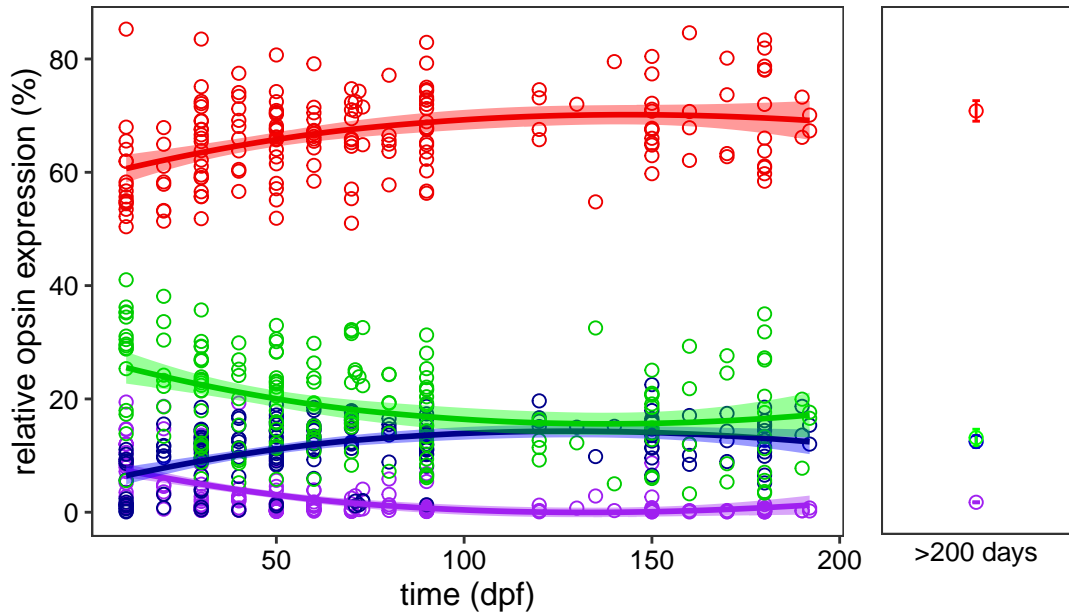

—○— SWS2B —○— SWS2A —○— RH2A —○— LWS

Pundamilia sp. 'pundamilia-like'

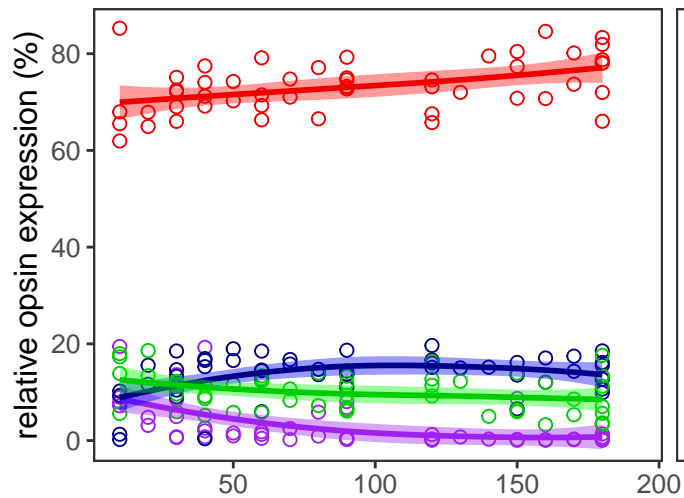

Hybrids

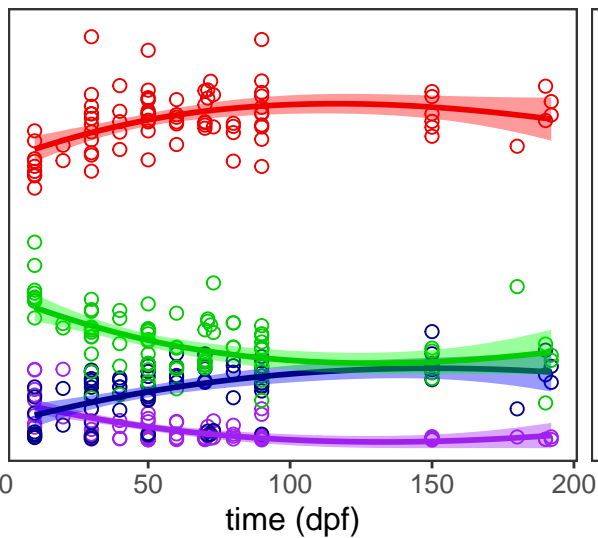

Pundamilia sp. 'nyererei-like'

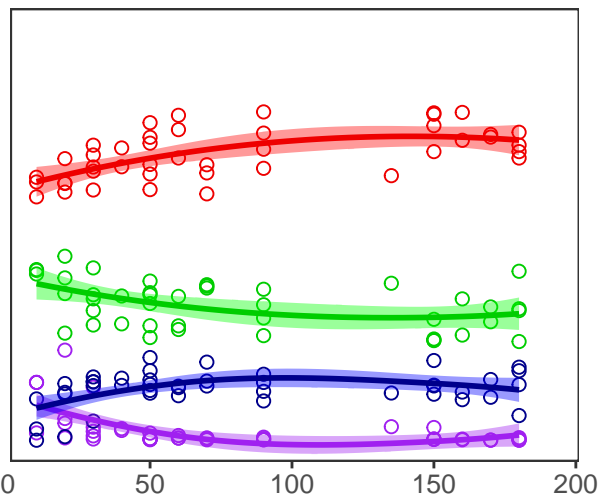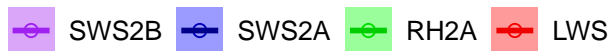

**A**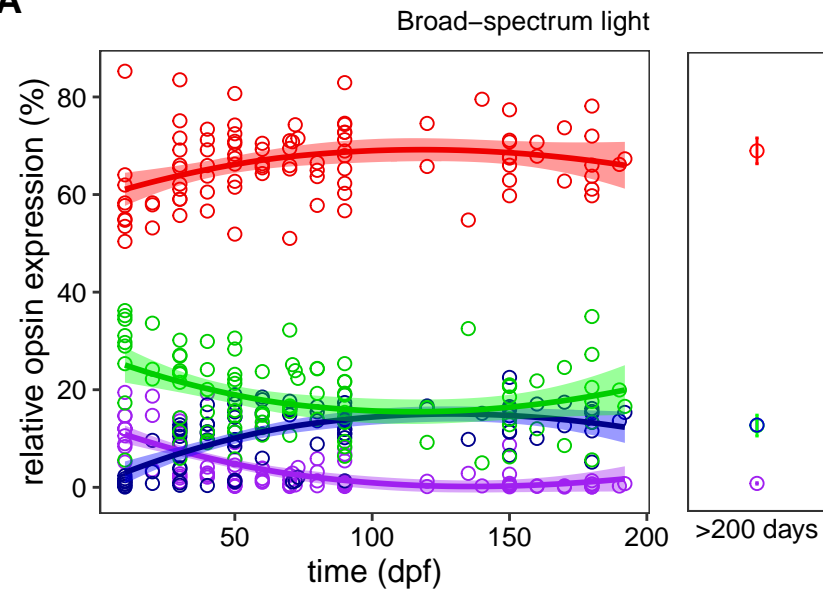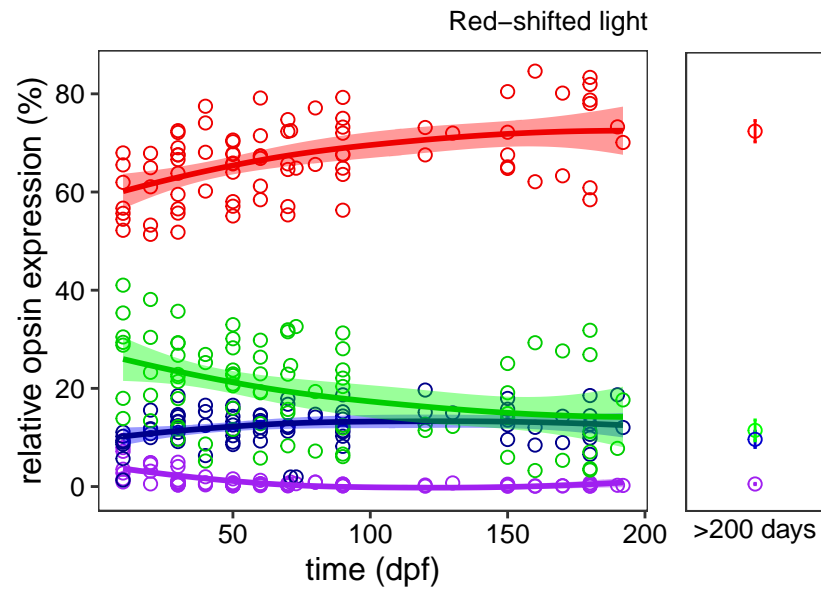

○ SWS2B  
 ○ SWS2A  
 ○ RH2A  
 ○ LWS

**B**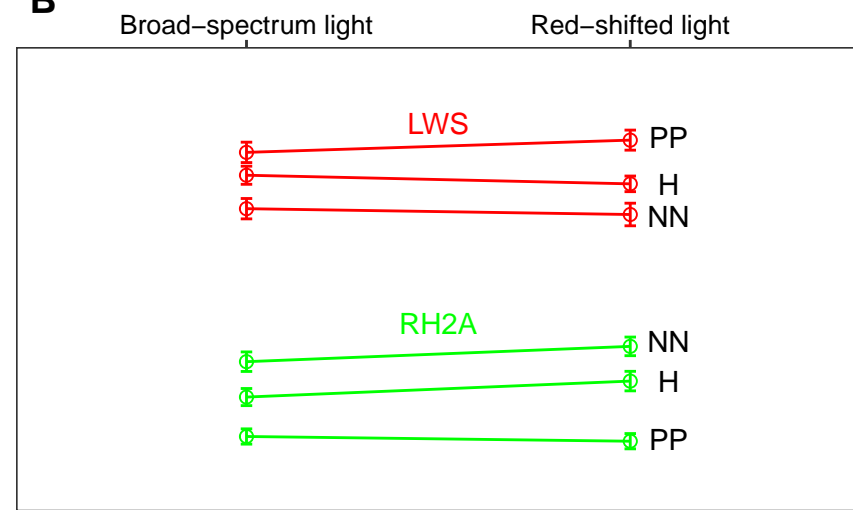

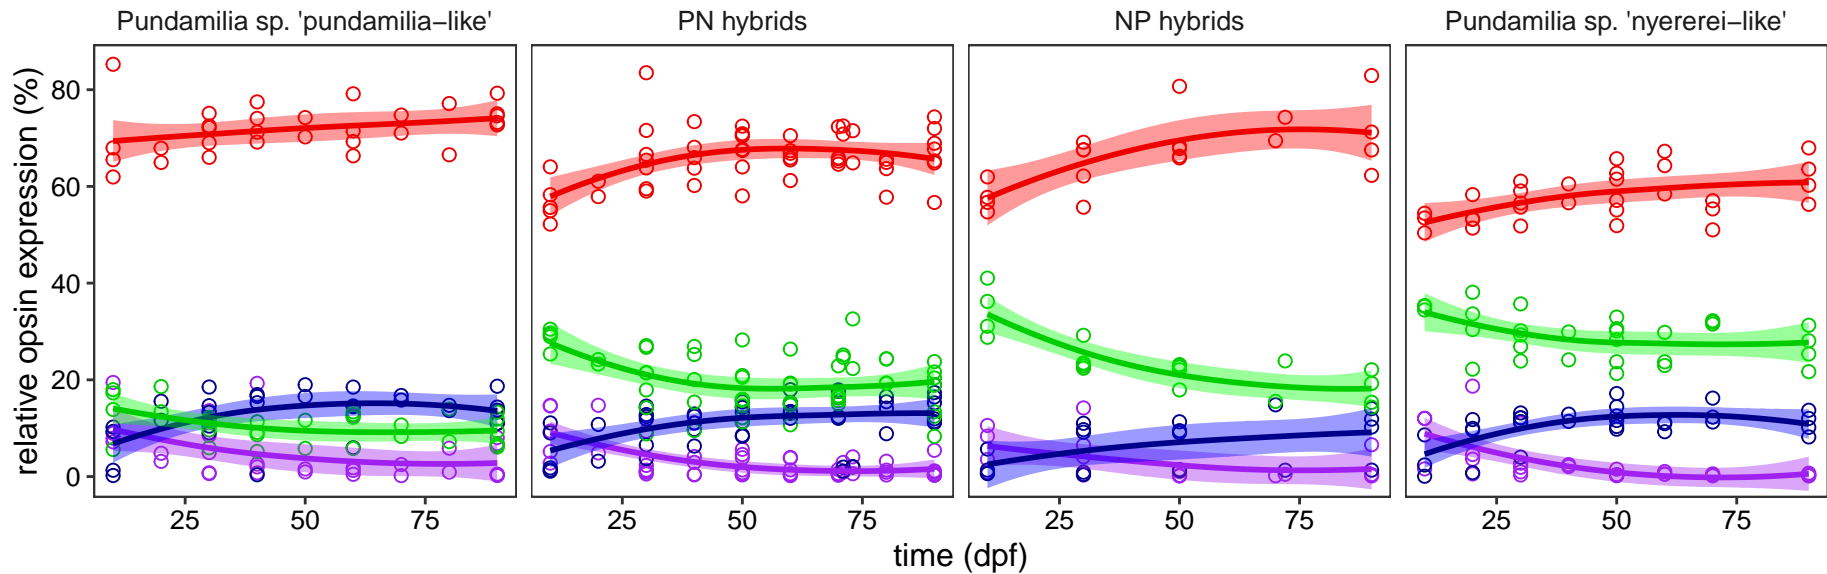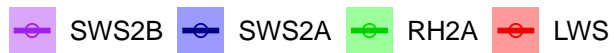

Source: https://biorxiv.org/content/10.1101/2021.09.01.458542v1.full.pdf
